# Supplementary material for: A new type of magnetic molecular imprinted material combined with β-cyclodextrin for the selective adsorption of zearalenone
Source: Royal Society of Chemistry journal article supplement (doi:10.1039/d0tb02146f), 2020-01-01
Supplement: d0tb02146f1.pdf [file d0tb02146f1.pdf]

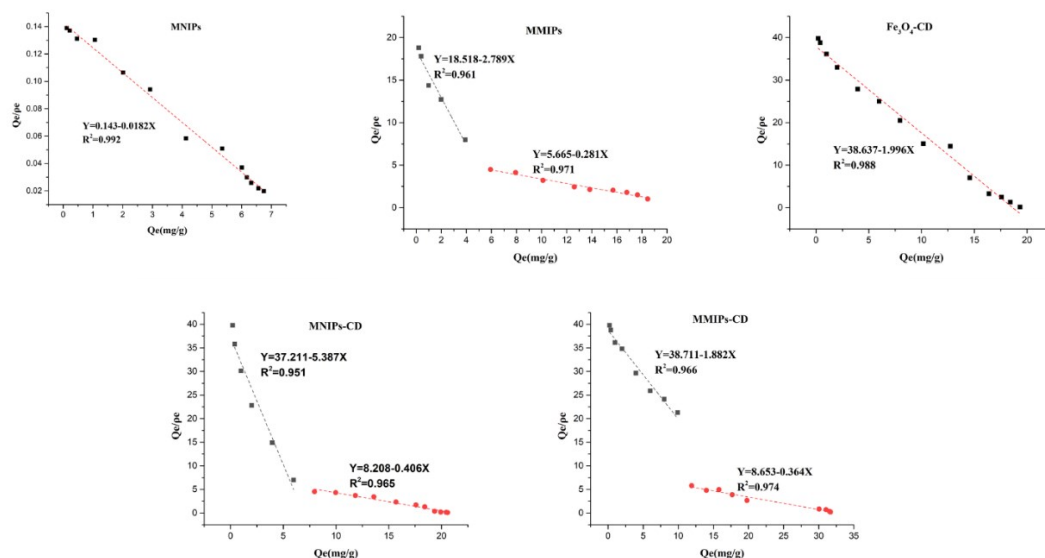

Figure S1. Static adsorption Scatchard fitting curve (MNIPs, MMIPs,  $\text{Fe}_3\text{O}_4\text{-CD}$ , MNIPs-CD, MMIPs-CD)

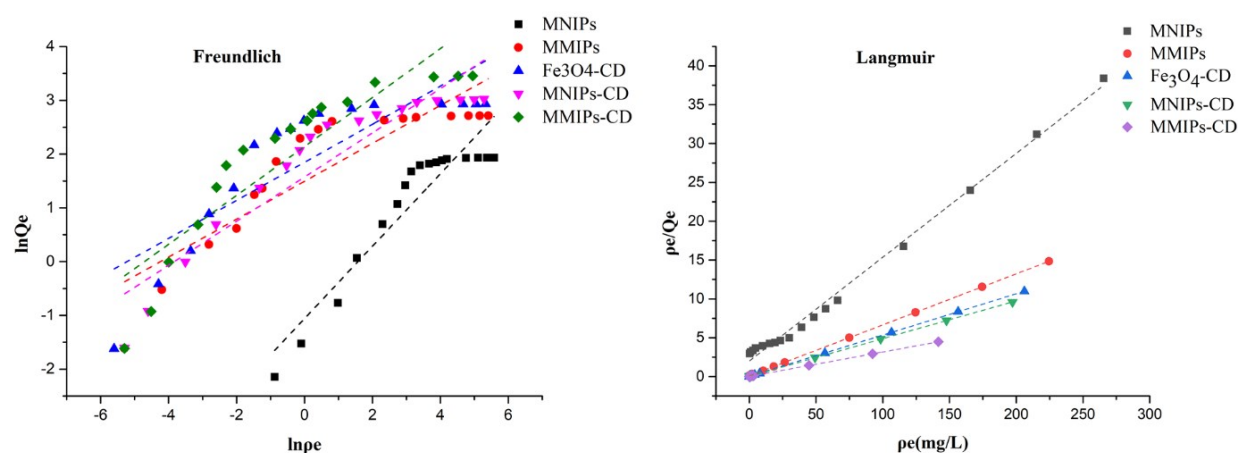

Figure S2. Static adsorption Freundlich and Langmuir fitting curves

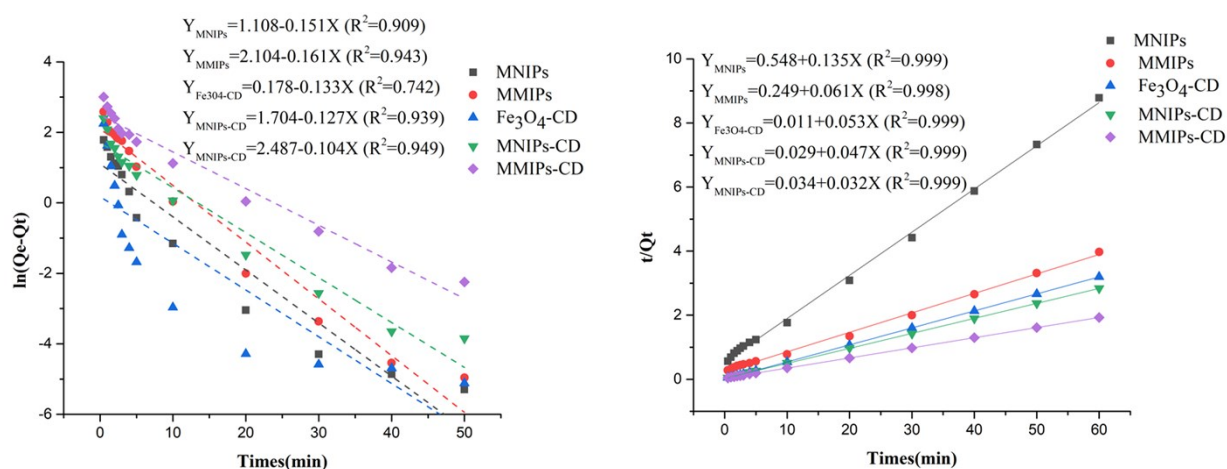

Figure S3. Dynamic adsorption fitting curve (A. pseudo-first-order plot B. pseudo-second-order plot)
